# Supplementary material for: Satisfaction with fertility- and sexuality-related information in young women with breast cancer—ELIPPSE40 cohort
Source: PubMed Central journal article supplement (PMC4523948; doi:10.1186/s12885-015-1542-0), 2015-08-05
Supplement: 12885_2015_1542_MOESM1_ESM.pdf [file 12885_2015_1542_MOESM1_ESM.pdf]

**Translation of the questions used in the analysis, extracted from the ELIPPSE40  
cohort questionnaires**

Article title:

Satisfaction with fertility- and sexuality-related information in young women with breast cancer -  
ELIPPSE40 cohort

Journal name:

BMC Cancer

Author names:

Ali BEN CHARIF, Anne-Déborah BOUHNİK, Dominique REY, Magali PROVANSAL, Blandine  
COURBIERE, Bruno SPIRE and Julien MANCINI

Affiliation and e-mail address of the corresponding author:

Julien MANCINI, Aix-Marseille University, UMR912, SESSTIM, “*Cancers, Biomedicine & Society*”  
team, [julien.mancini@univ-amu.fr](mailto:julien.mancini@univ-amu.fr)

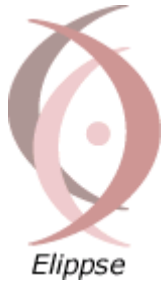

*Etude Longitudinale sur l'Impact  
Psychosocial des Pathologies du SEin*

**Inserm**

Institut national  
de la santé et de la recherche médicale

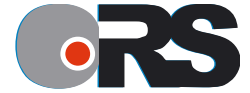

OBSERVATOIRE REGIONAL DE LA SANTE  
PROVENCE-ALPES-CÔTE D'AZUR

# « LONGITUDINAL STUDY OF THE PSYCHOSOCIAL IMPACT OF BREAST PATHOLOGY (PACA AND CORSICA REGIONS) »

**PATIENT QUESTIONNAIRE: TELEPHONE INTERVIEWS**

**PERIOD: BASELINE (M0)**

### *Socio-demographic characteristics*

**Year of birth:** 19 / \_\_ / \_\_ /

**Is French your mother-language?**  Yes  No

**Are you currently living with a partner?**  Yes  No

*If "No":*

**Do you have emotional and sexual relationship with a regular partner?**  Yes  No

**How many children have you had (including adopted children)?** |\_\_| |\_\_| children, among which |\_\_| |\_\_| adopted children

**What is your highest education level?**

1. You have not been to school
2. No diploma, but schooled until primary school or college
3. No diploma, but schooled beyond college
4. CEP (primary school certificate)
5. BEPC (General Certificate of Secondary Education), elementary certificate, general education certificate
6. CAP (Vocational Training Certificate), companion certificate
7. BEP (Professional Training Certificate)
8. General Baccalaureate, Advanced Certificate
9. Technological or professional baccalaureate, professional or technician's certificate, Certificate of Agricultural Education (BEA), of Commercial Education (BEC), of Industrial Education (BEI), of Hotelier Instruction (BEH), basic legal qualification
10. An undergraduate university degree, BTS (Advanced Technician's Diploma), DUT (Technical Diploma from a University Technology Institute), Diplomas related to healthcare and social services
11. Advanced University Degrees from a highly competitive public or private college or engineering college.

**Do you have a job?**  Yes  No

### *Circumstances of cancer diagnosis*

**On what date was your disease diagnosed (month/year)?** Month: /\_\_ / \_\_ / Year: 20 / \_\_ / \_\_ /

**Who announced you the diagnosis of your disease?**

- A generalist
- A gynaecologist
- A surgeon
- A radiologist
- A chemotherapist
- A radiotherapist
- A laboratory staff member
- A nurse
- Another person. Specify: \_\_\_\_\_

**At diagnosis disclosure, did you have the opportunity to ask all the questions you wished?**

- Yes, absolutely
- Yes, maybe
- No, not really
- No, not at all

**At diagnosis disclosure, did you receive information about your disease?**  Yes  No

*If "Yes":*

**Would you say the information you received was understandable?**

- Yes, absolutely
- Yes, maybe
- No, not really
- No, not at all

**Would you say the information you received met your expectations?**

- Yes, absolutely
- Yes, maybe
- No, not really
- No, not at all

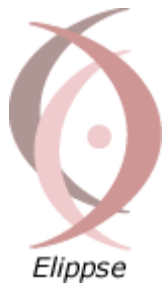

*Etude Longitudinale sur l'Impact  
Psychosocial des Pathologies du SEin*

**Inserm**

Institut national  
de la santé et de la recherche médicale

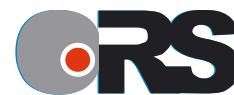

**OBSERVATOIRE REGIONAL DE LA SANTE**  
PROVENCE-ALPES-CÔTE D'AZUR

# « LONGITUDINAL STUDY OF THE PSYCHOSOCIAL IMPACT OF BREAST PATHOLOGY (PACA AND CORSICA REGIONS) »

**MEDICAL QUESTIONNAIRE: POSTAL SURVEY**

**PERIOD: DIAGNOSIS + 10 MONTHS (M10)**

## Tumour characteristics

|                                                                                                                       |                                                                                                                                                      |
|-----------------------------------------------------------------------------------------------------------------------|------------------------------------------------------------------------------------------------------------------------------------------------------|
| <b>Date of first suspect examination of malignancy (mammography, ultrasound...)?</b>                                  | 1__1__1/1__1__1/201__1__1                                                                                                                            |
| <b>Date of cancer diagnosis (month/year)?</b>                                                                         | 1__1__1/1__1__1/201__1__1                                                                                                                            |
| <b>Histological type</b>                                                                                              |                                                                                                                                                      |
| <input type="checkbox"/> Invasive ductal carcinoma                                                                    |                                                                                                                                                      |
| <input type="checkbox"/> Invasive lobular carcinoma                                                                   |                                                                                                                                                      |
| <input type="checkbox"/> Ductal carcinoma <i>in situ</i>                                                              |                                                                                                                                                      |
| <input type="checkbox"/> Lobular carcinoma <i>in situ</i>                                                             |                                                                                                                                                      |
| <input type="checkbox"/> Another. Specify: _____                                                                      |                                                                                                                                                      |
| <input type="checkbox"/> Unknown                                                                                      |                                                                                                                                                      |
| <b>pTNM clinical classification</b>                                                                                   |                                                                                                                                                      |
| <b>pT – Primary Tumor</b>                                                                                             |                                                                                                                                                      |
| <input type="checkbox"/> pT0 (no evidence of primary tumor)                                                           |                                                                                                                                                      |
| <input type="checkbox"/> pTis (carcinoma <i>in situ</i> )                                                             |                                                                                                                                                      |
| <input type="checkbox"/> pT1 (tumor 2 cm or less in greatest dimension)                                               |                                                                                                                                                      |
| <input type="checkbox"/> pT2 (tumor >2 cm and ≤5 cm in greatest dimension)                                            |                                                                                                                                                      |
| <input type="checkbox"/> pT3 (tumor >5 cm in greatest dimension)                                                      |                                                                                                                                                      |
| <input type="checkbox"/> pT4 (tumor of any size with direct extension to chest wall or skin)                          |                                                                                                                                                      |
| <input type="checkbox"/> pTX (primary tumor cannot be assessed)                                                       |                                                                                                                                                      |
| <b>pN – Regional Lymph Nodes</b>                                                                                      |                                                                                                                                                      |
| <input type="checkbox"/> pN0 (no regional lymph nodes metastasis)                                                     |                                                                                                                                                      |
| <input type="checkbox"/> pN1 (metastasis to movable ipsilateral axillary node(s))                                     |                                                                                                                                                      |
| <input type="checkbox"/> pN2 (metastasis to ipsilateral axillary node(s) fixed to one another or to other structures) |                                                                                                                                                      |
| <input type="checkbox"/> pN3 (metastasis to ipsilateral internal mammary lymph node(s))                               |                                                                                                                                                      |
| <input type="checkbox"/> pNX (regional lymph nodes cannot be assessed)                                                |                                                                                                                                                      |
| <b>M – Distance Metastasis</b>                                                                                        |                                                                                                                                                      |
| <input type="checkbox"/> M0 (no distant metastasis)                                                                   |                                                                                                                                                      |
| <input type="checkbox"/> M1 (presence of distant metastasis)                                                          |                                                                                                                                                      |
| <input type="checkbox"/> MX (metastasis cannot be assessed)                                                           |                                                                                                                                                      |
| <b>ErbB2 status:</b>                                                                                                  | <input type="checkbox"/> Positive <input type="checkbox"/> Negative <input type="checkbox"/> Unknown                                                 |
| <b>Grade of Scarff-Bloom-Richardson:</b>                                                                              | <input type="checkbox"/> SBR I <input type="checkbox"/> SBR II <input type="checkbox"/> SBR III <input type="checkbox"/> Unknown                     |
| <b>Estrogen receptor:</b>                                                                                             | Results ___% <input type="checkbox"/> Positive <input type="checkbox"/> Negative <input type="checkbox"/> No dosage <input type="checkbox"/> Unknown |
| <b>Progesterone receptor:</b>                                                                                         | Results ___% <input type="checkbox"/> Positive <input type="checkbox"/> Negative <input type="checkbox"/> No dosage <input type="checkbox"/> Unknown |

## Information about treatment

|                                         |                                                                                                                                                                                                         |
|-----------------------------------------|---------------------------------------------------------------------------------------------------------------------------------------------------------------------------------------------------------|
| <b>Surgery:</b>                         | <input type="checkbox"/> Total mastectomy <input type="checkbox"/> Partial mastectomy <input type="checkbox"/> Prophylactic mastectomy <input type="checkbox"/> Tumorectomy <input type="checkbox"/> No |
| <b>Chemotherapy:</b>                    | <input type="checkbox"/> Neoadjuvant <input type="checkbox"/> Adjuvant <input type="checkbox"/> No                                                                                                      |
| <i>If "Yes"</i>                         |                                                                                                                                                                                                         |
| Type of chemotherapy:                   | _____                                                                                                                                                                                                   |
| Number of planned cycles:               | 1__1__1                                                                                                                                                                                                 |
| Number of performed cycles:             | 1__1__1                                                                                                                                                                                                 |
| <b>Radiotherapy:</b>                    | <input type="checkbox"/> Neoadjuvant <input type="checkbox"/> Adjuvant <input type="checkbox"/> No                                                                                                      |
| <b>Trastuzumab:</b>                     | <input type="checkbox"/> Yes <input type="checkbox"/> No                                                                                                                                                |
| <b>Hormone therapy:</b>                 | <input type="checkbox"/> Yes <input type="checkbox"/> No                                                                                                                                                |
| <i>If "Yes"</i>                         |                                                                                                                                                                                                         |
| Type of hormone therapy:                | _____                                                                                                                                                                                                   |
| Posology:                               | 1__1__1 mg / day                                                                                                                                                                                        |
| Total timeline:                         | 1__1__1 years                                                                                                                                                                                           |
| <b>Family history of breast cancer:</b> | <input type="checkbox"/> Yes <input type="checkbox"/> No <input type="checkbox"/> Unknown                                                                                                               |
| <b>Family history of other cancers:</b> | <input type="checkbox"/> No <input type="checkbox"/> Yes. Specify if known: _____                                                                                                                       |

*Co-morbidities*

**Myocardial infarction:**  Yes  No

**Congestive heart failure:**  Yes  No

**Peripheral vascular disease:**  Yes  No

**Cerebrovascular accident (except Hemiplegia):**  Yes  No

**Hemiplegia:**  Yes  No

**Dementia:**  Yes  No

**Chronic pulmonary disease:**  Yes  No

**Rheumatic or connective Tissue Disease:**  Yes  No

**Oeso-gastro-duodenal ulcers:**  Yes  No

**Diabetes:**  Uncomplicated  With documented target organ damage  No

**Liver hepatic:**  Mild  Moderate or severe  No

**Kidney disease:**  Mild  Moderate or severe  No

**Leukaemia:**  Yes  No

**Lymphoma, multiple myeloma:**  Yes  No

**AIDS:**  Yes  No

**Others** \_\_\_\_\_

**History of breast pathology or surgery:**  Unknown  No  Yes. Specify if known \_\_\_\_\_

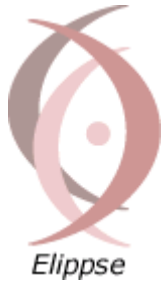

*Etude Longitudinale sur l'Impact  
Psychosocial des Pathologies du Sein*

**Inserm**

Institut national  
de la santé et de la recherche médicale

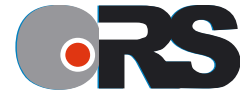

**OBSERVATOIRE REGIONAL DE LA SANTE**  
PROVENCE-ALPES-CÔTE D'AZUR

# « LONGITUDINAL STUDY OF THE PSYCHOSOCIAL IMPACT OF BREAST PATHOLOGY (PACA AND CORSICA REGIONS) »

**PATIENT QUESTIONNAIRE: TELEPHONE INTERVIEWS**

**PERIOD: DIAGNOSIS + 10 MONTHS (M10)**

*Attention and/or memory problems*

RESPONSES FOR EACH ITEM: 1. Very often 2. Often 3. Rarely 4. Never

**Do you have attention difficulties, for example, to read or watch TV?**

**Do you have difficulties to memorize or remember things?**

*The 21-item Mental Adjustment to Cancer*

INSTRUCTION FOR QUESTIONS: *the following statements describe people's reactions to having breast disease. Please indicate us, for each statement, how far it applies to you at present.*

RESPONSES FOR EACH ITEM: 1. Definitely does not apply to me 2. Does not apply to me 3. Applies to me 4. Definitely applies to me

*(Anxious preoccupation)*

**I feel that problems with my health prevent me from planning ahead**

**I don't dwell on my illness**

**I worry about my breast disease returning or getting worse**

**I suffer great anxiety about it**

**I feel very angry about what has happened to me**

*(Helplessness – Hopelessness)*

**I feel I can't do anything to cheer myself up**

**I feel that nothing I can do will make any difference**

**I feel that life is hopeless**

**I feel there is nothing I can do to help myself**

**I am not very hopeful about the future**

**I feel like giving up**

**I feel completely at a loss about what to do**

*(Fighting spirit)*

**I believe that my positive attitude will benefit my health**

**I firmly believe that I will get better**

**I have plans for the future, e.g. holiday, jobs, housing**

**I think my state of mind can make a lot of difference to my health**

**I try to carry on my life as I've always done**

**I try to keep a sense of humour about it**

**I try to have a very positive attitude**

**I count my blessings**

**I try to fight the illness**





*Etude Longitudinale sur l'Impact  
Psychosocial des Pathologies du SEin*

**Inserm**

Institut national  
de la santé et de la recherche médicale



OBSERVATOIRE REGIONAL DE LA SANTE  
PROVENCE-ALPES-CÔTE D'AZUR

# « LONGITUDINAL STUDY OF THE PSYCHOSOCIAL IMPACT OF BREAST PATHOLOGY (PACA AND CORSICA REGIONS) »

**PATIENT QUESTIONNAIRE: TELEPHONE INTERVIEWS**

**PERIOD: DIAGNOSIS + 16 MONTHS (M16)**

*Fertility-related information*

**Currently, your menstruations are:** 1. Regular 2. Irregular 3. Absent menstrual periods

*If “Irregular or absent menstrual periods”*

**This phenomenon occurred:** 1. Before my breast disease 2. Since my breast disease and its treatments

*If “Since my breast disease and its treatments”*

**Before treatment, have you been clearly informed about how it might affect your fertility?** 1. Yes 2. No



*Etude Longitudinale sur l'Impact  
Psychosocial des Pathologies du Sein*

**Inserm**

Institut national  
de la santé et de la recherche médicale



OBSERVATOIRE REGIONAL DE LA SANTE  
PROVENCE-ALPES-CÔTE D'AZUR

# « LONGITUDINAL STUDY OF THE PSYCHOSOCIAL IMPACT OF BREAST PATHOLOGY (PACA AND CORSICA REGIONS) »

**PATIENT QUESTIONNAIRE: TELEPHONE INTERVIEWS**

**PERIOD: DIAGNOSIS + 48 MONTHS (M48)**

### *Satisfaction with fertility- and sexuality-related information*

RESPONSES FOR EACH ITEM: 1. Strongly disagree 2. Disagree 3. Neither agree nor disagree 4. Agree 5. Strongly agree

**I think I have received sufficient information about how disease and treatment (including surgery) might affect my sexual life**

**I think I have received sufficient information about how treatment (including surgery) might affect my fertility**

### *Sexual dysfunction*

**My sexual life has been negatively affected after the initiation of my breast disease**

1. Not at all 2. Slightly 3. Rather much 4. Much 5. Very much 6. Inadequate question

**My breast disease has affected my sexual desire (libido)**

1. Increased 2. No change 3. Decreased 4. All gone 5. Inadequate question

**My treatment has affected my sexual desire (libido)**

1. Increased 2. No change 3. Decreased 4. All gone 5. Inadequate question

**The frequency of sexual intercourse has changed now as compared to before my breast disease**

1. Increased a lot 2. Somewhat increased 3. No change 4. Somewhat decreased 5. Decreased a lot 6. Inadequate question

**My possibility to reach orgasm has changed now as compared to before my breast disease**

1. Increased a lot 2. Somewhat increased 3. No change 4. Somewhat decreased 5. Decreased a lot 6. Inadequate question

### *Quality of life (WHOQOL-BREF)*

**How would you rate your quality of life?**

1. Very poor 2. Poor 3. Neither poor nor good 4. Good 5. Very good

**How satisfied are you with your health?**

1. Very dissatisfied 2. Dissatisfied 3. Neither satisfied nor dissatisfied 4. Satisfied 5. Very satisfied

### *Body Image Scale*

INSTRUCTION FOR QUESTIONS: *in this questionnaire you will be asked how you feel about your appearance, and about any changes that may have resulted from your disease or treatment. Please listen each item carefully, and give the reply which comes closest to the way you have been feeling about yourself, during the past week.*

RESPONSES FOR EACH ITEM: 1. Not at all 2. A little 3. Quite a bit 4. Very much

**Have you been feeling self-conscious about your appearance?**

**Have you felt less physically attractive as a result of your disease or treatment?**

**Have you been dissatisfied with your appearance when dressed?**

**Have you been feeling less feminine as a result of your disease or treatment?**

**Did you find it difficult to look at yourself naked?**

**Have you been feeling less sexually attractive as a result of your disease or treatment?**

**Did you avoid people because of the way you felt about your appearance?**

**Have you been feeling the treatment has left your body less whole?**

**Have you felt dissatisfied with your body?**

**Have you been dissatisfied with the appearance of your scar? (add the response: 5. Not applicable)**

### *Depressive symptoms (CES-D)*

INSTRUCTION FOR QUESTIONS: *the following impressions are felt by most people. Please tell me often you have felt or behaved this ways during the past week.*

RESPONSES FOR EACH ITEM: 1. Never, very rarely (under 1 day) 2. Occasionally (1-2 days) 3. Quite often (3-4 days) 4. Frequently, all time (5-7 days)

**I was bothered by things that usually don't bother me**

**I did not feel like eating, my appetite was poor**

**I felt that I could not shake off the blues even with help from family or friends**

**I felt that I was just as good as other people**

**I had trouble keeping my mind on what I was doing**

**I felt depressed**

**I felt that everything I did was an effort**

**I felt hopeful about the future**

**I thought my life had been a failure**

**I felt fearful**

**My sleep was restless**

**I was happy**

**I talked less than usual**

**I felt lonely**

**People were I enjoyed life unfriendly**

**I enjoyed life**

**I had crying spells**

**I felt sad**

**I felt that people dislike me**

**I could not get going**

### *Other questions*

**Are you satisfied with the medical follow-up for your disease?**

1. Yes, absolutely 2. Yes, rather 3. No, not really 4. No, not at all

**Currently, regarding your fertility:**

1. You cannot have children, specify (oophorectomy, hysterectomy, tubal ligation, other)
2. You cannot have children for the time being, specify (medical castration, chemotherapy, hormone therapy)
3. You can have children
4. Other situation specify (especially if medical recommendation to wait for a pregnancy)
5. Do not know
